# Supplementary material
Source: PubMed Central journal article supplement (PMC2098844)

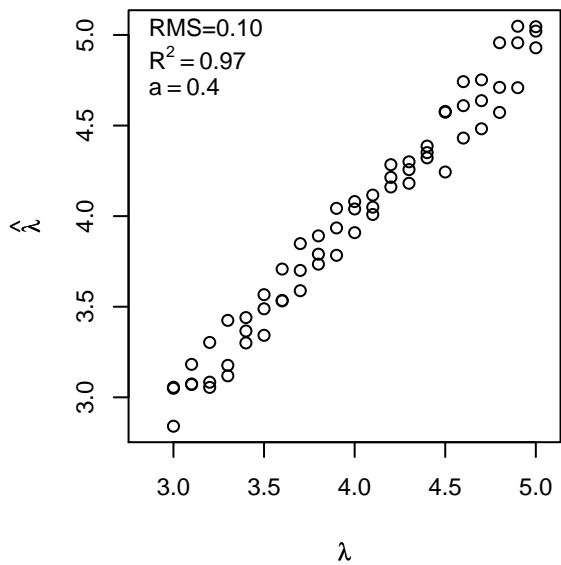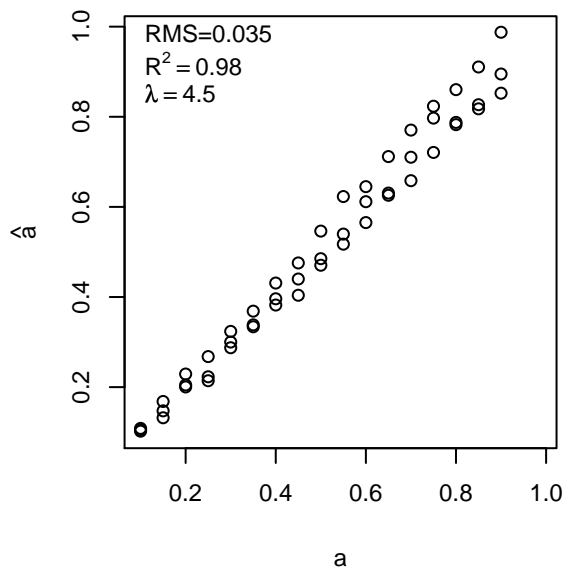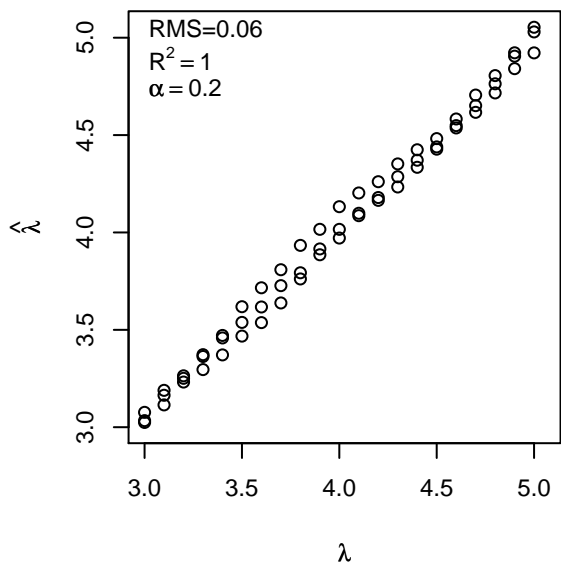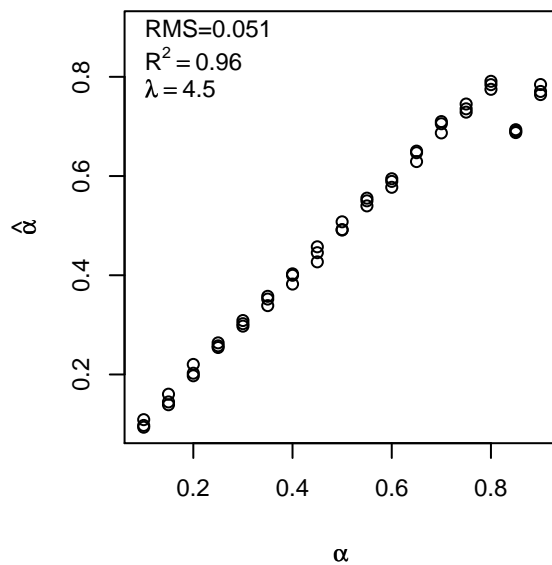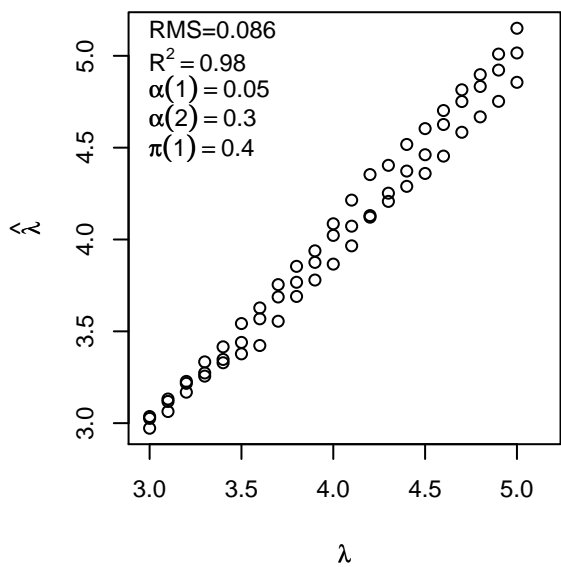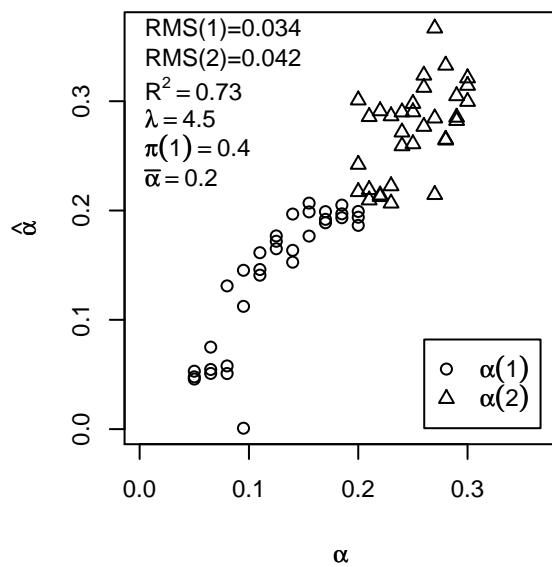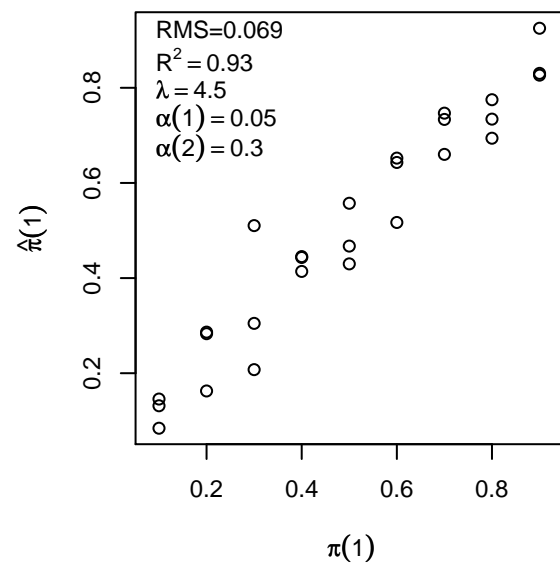

Supplement: pcbi.0030214.sg001.pdf [file pcbi.0030214.sg001.pdf]

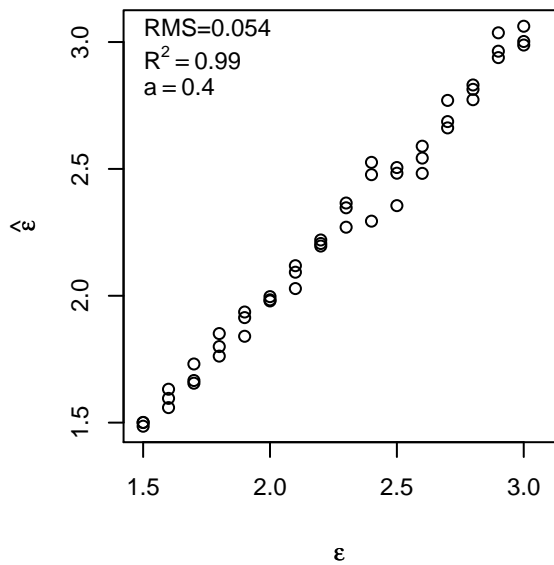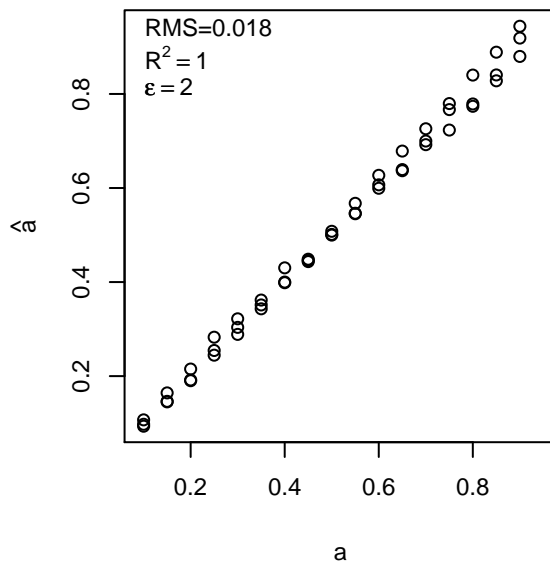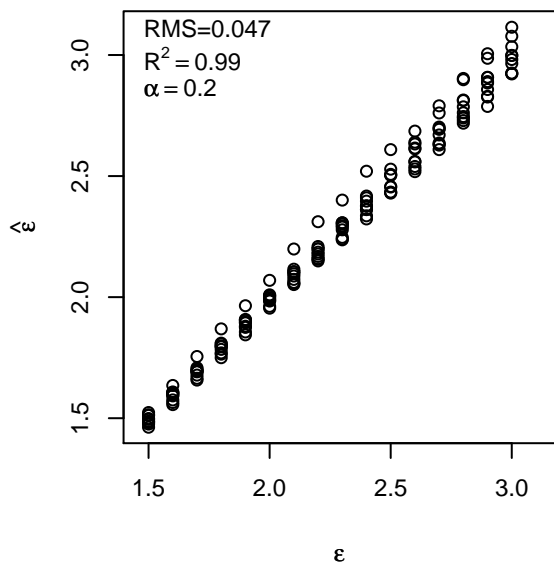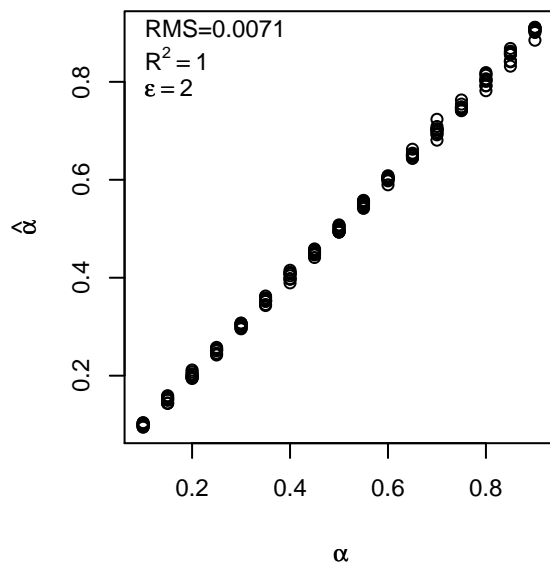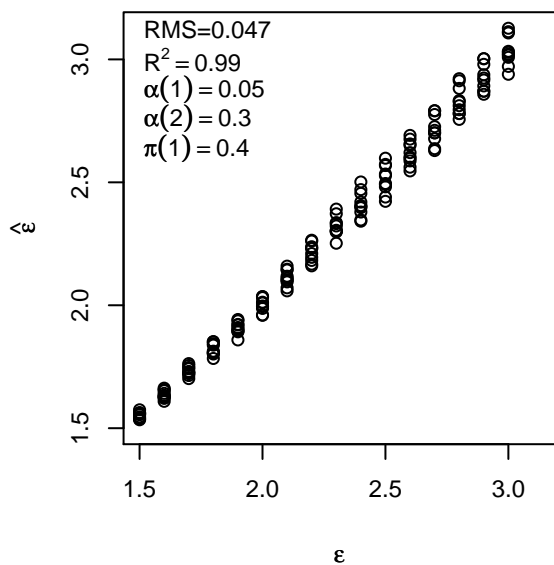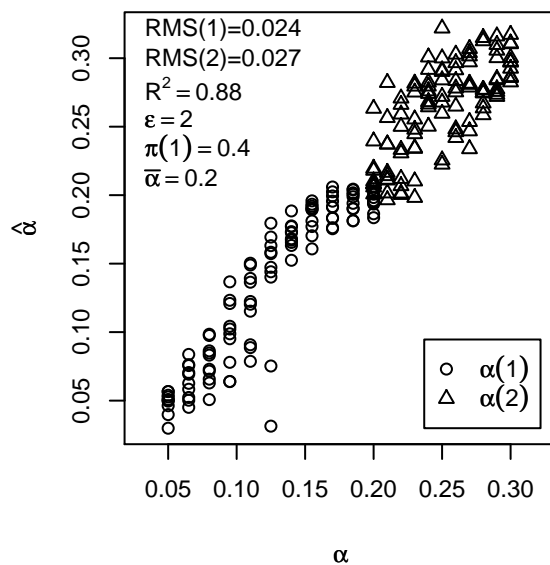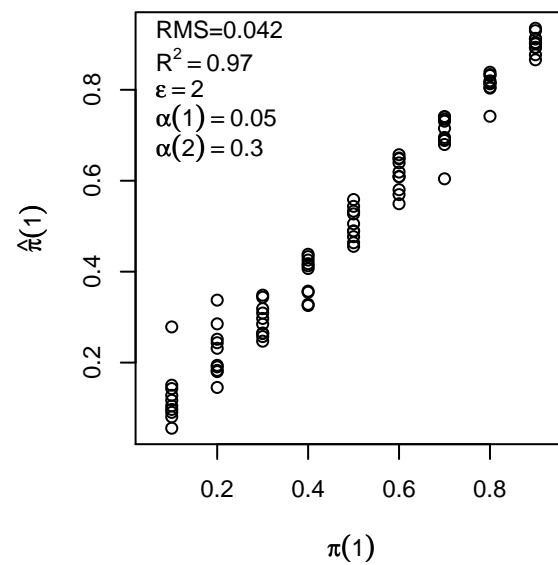

Supplement: pcbi.0030214.sg002.pdf [file pcbi.0030214.sg002.pdf]

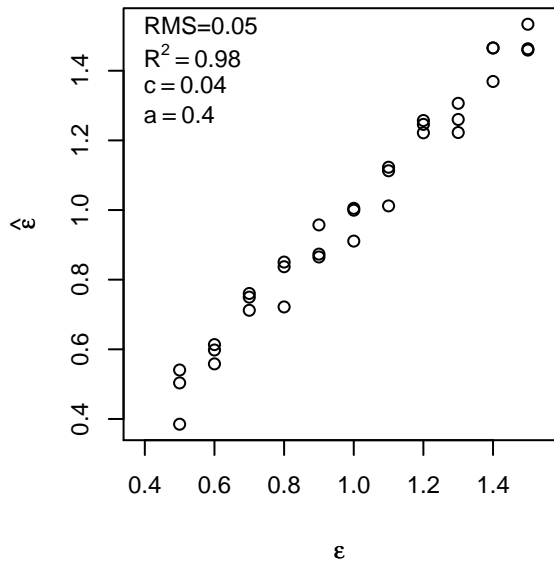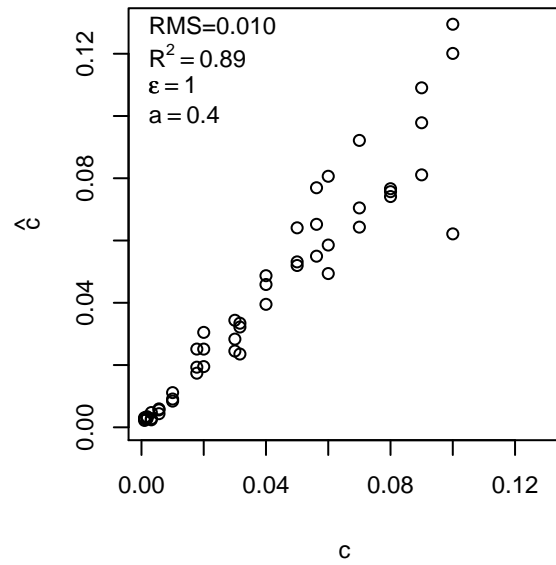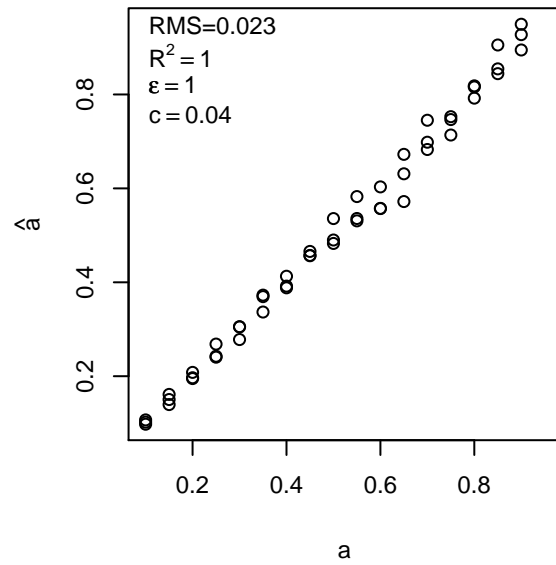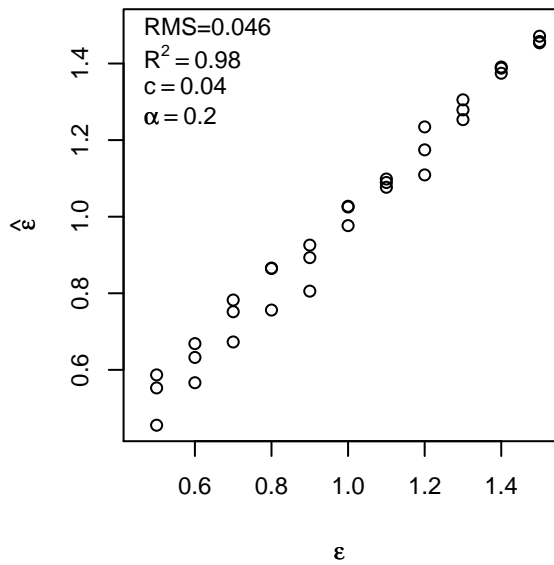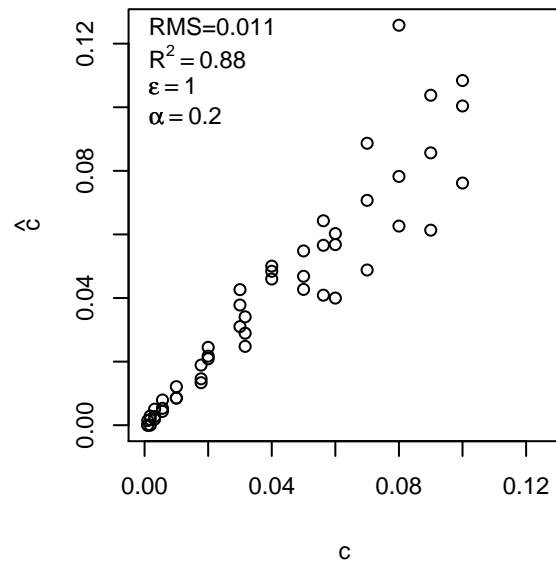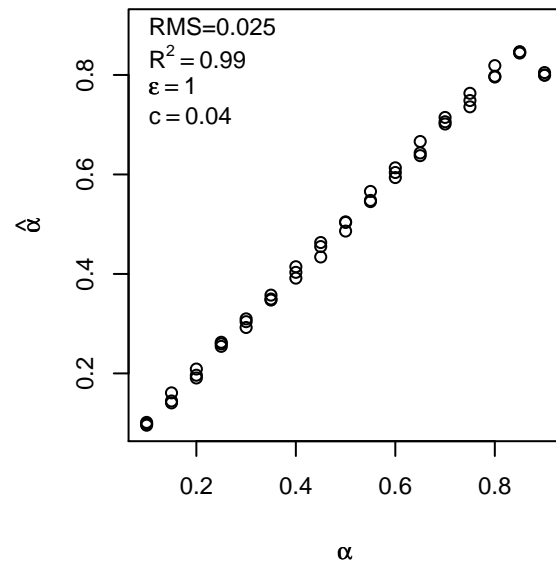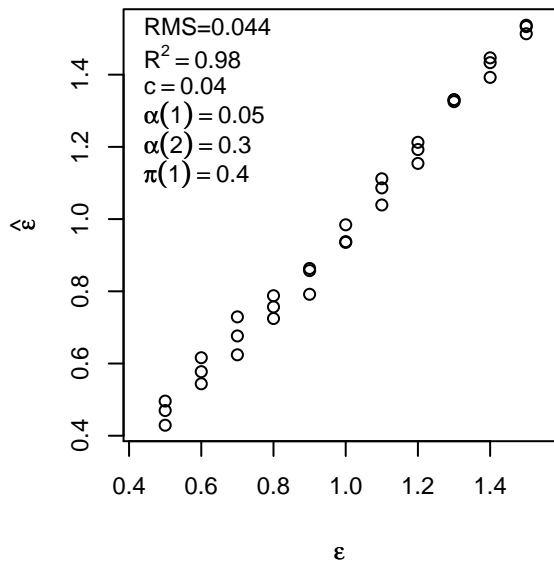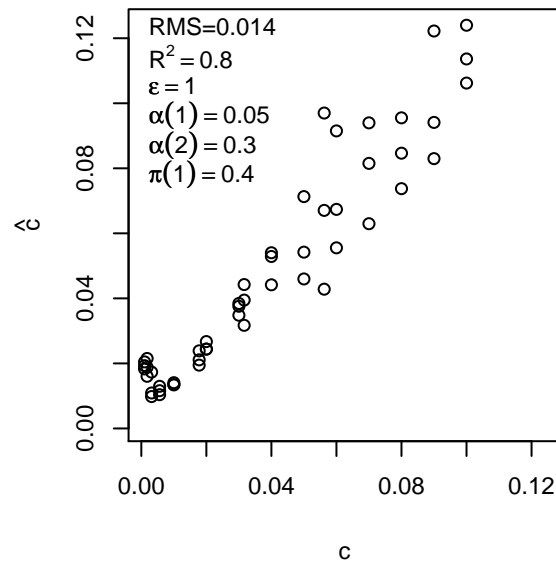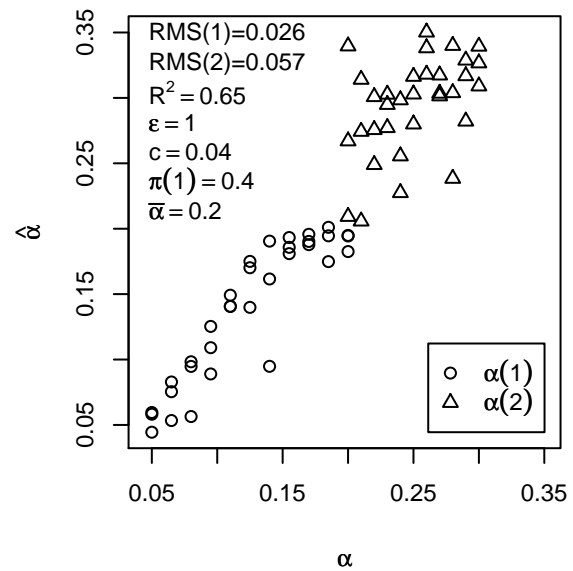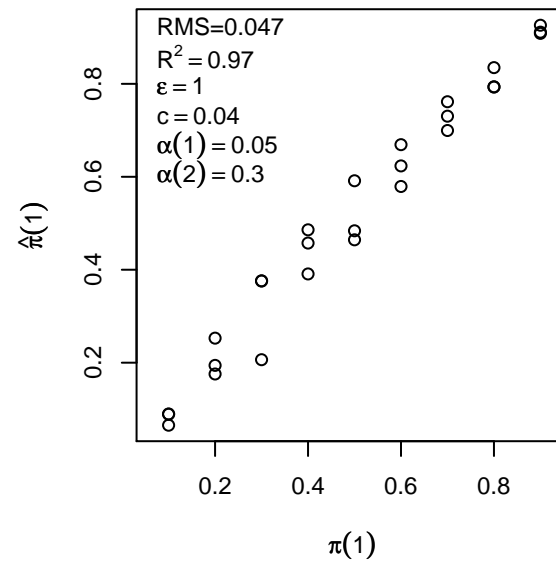

Supplement: pcbi.0030214.sg003.pdf [file pcbi.0030214.sg003.pdf]

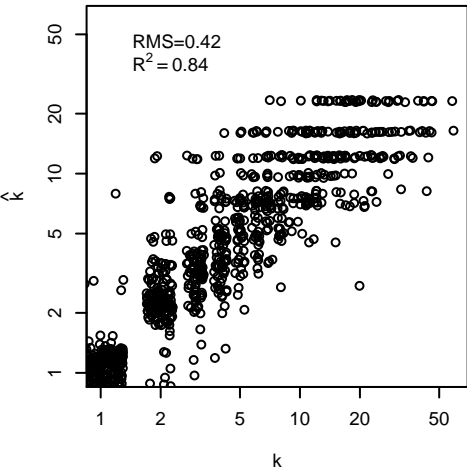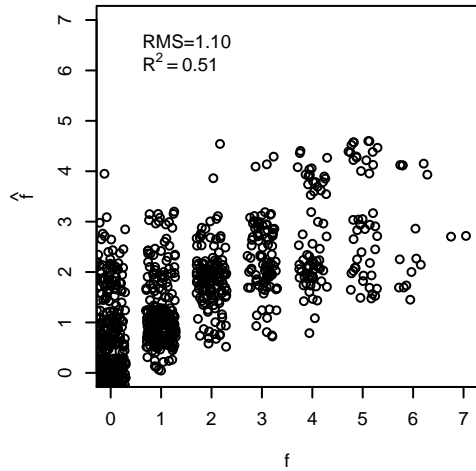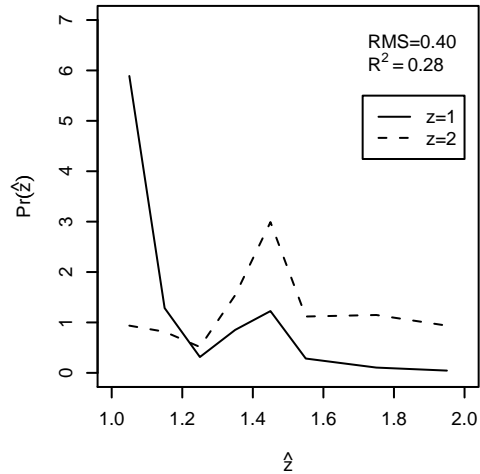

Supplement: pcbi.0030214.sg004.pdf [file pcbi.0030214.sg004.pdf]

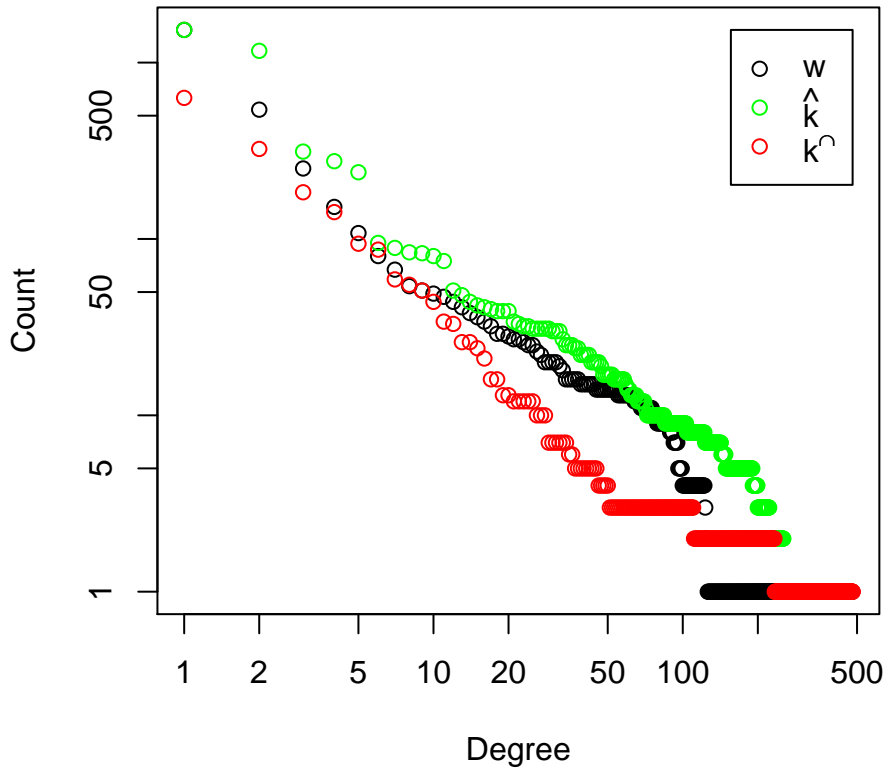

Supplement: pcbi.0030214.sg005.pdf [file pcbi.0030214.sg005.pdf]
